# Supplementary material for: Tricuspid Valve Intervention at the Time of Pulmonary Valve Replacement in Adults With Congenital Heart Disease: A Systematic Review and Meta‐Analysis
Source: PubMed Central journal article supplement — J Am Heart Assoc. 2021 Dec 7;10(24):e022909. doi: 10.1161/JAHA.121.022909 (PMC9075262; doi:10.1161/jaha.121.022909), 2021-12-07

# **SUPPLEMENTAL MATERIAL**

## **Data S1.**

### **Supplemental Methods**

#### *Search strategy.*

PubMed (n=393 on 29/12/2020)

("Pulmonary Valve"[Mesh] OR "Pulmonary valve\*" OR "Valves, Pulmonary" OR "Valve, Pulmonary") AND ("Replacement\*" OR "Replantation\*" OR "Surgical Replantation\*" OR "Replantation, Surgical" OR "Reimplantation\*") AND ("Tricuspid Valve"[Mesh] OR "Tricuspid valve\*" OR "Valve, Tricuspid" OR "Valves, Tricuspid" OR "Tricuspid")

Embase (n=709 on 29/12/2020)

((('pulmonary valve'/exp AND ('replacement' OR 'replantation' OR 'reimplantation')) OR 'pulmonary valve replacement'/exp OR 'pulmonary valve replacement') AND ('tricuspid valve'/exp OR 'tricuspid valve' OR 'tricuspid'))

Scopus (n=929 on 29/12/2020)

( TITLE-ABS-KEY ( "Pulmonary valve\*" OR "Valves, Pulmonary" OR "Valve, Pulmonary" ) AND TITLE-ABS-KEY ( "Replacement\*" OR "Replantation\*" OR "Surgical Replantation\*" OR "Replantation,Surgical" OR "Reimplantation\*" ) AND TITLE-ABS-KEY ( "Tricuspid valve\*" OR "Valve, Tricuspid" OR "Valves, Tricuspid" OR "Tricuspid" ) )

**Figure S1. Bias assessment of observational studies (ROBINS-1 tool).**

|       |                  | Risk of bias domains |    |    |    |    |    |    |
|-------|------------------|----------------------|----|----|----|----|----|----|
|       |                  | D1                   | D2 | D3 | D4 | D5 | D6 | D7 |
| Study | Deshaies 2020    |                      |    |    |    |    |    |    |
|       | Taejung Kim 2019 |                      |    |    |    |    |    |    |
|       | Lueck 2018       |                      |    |    |    |    |    |    |
|       | Roubertie 2017   |                      |    |    |    |    |    |    |
|       | Cramer 2015      |                      |    |    |    |    |    |    |
|       | Kogon 2015       |                      |    |    |    |    |    |    |

Domains:

- D1: Bias due to confounding.
- D2: Bias due to selection of participants.
- D3: Bias in classification of interventions.
- D4: Bias due to deviations from intended interventions.
- D5: Bias due to missing data.
- D6: Bias in measurement of outcomes.
- D7: Bias in selection of the reported result.

Judgement

- Critical
- Serious
- Moderate
- Low

**Figure S2. Forest plots for TR grade (0-3). Pooled mean difference and conclusions plot for all comparisons.** CI, confidence interval; MD, mean difference; PVR, pulmonary valve replacement; SD, standard deviation; TR, tricuspid regurgitation; TVI, tricuspid valve intervention.

**A. Difference in pre-op TR grade (0-3) between TVI+PVR and PVR**

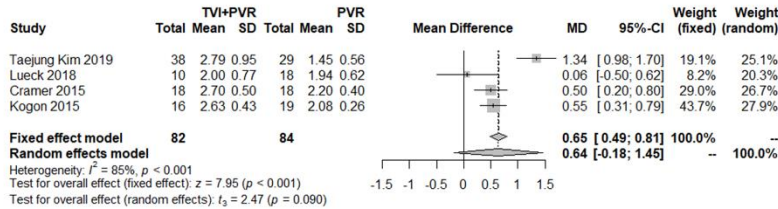

**B. Difference in post-op TR grade (0-3) between TVI+PVR and PVR**

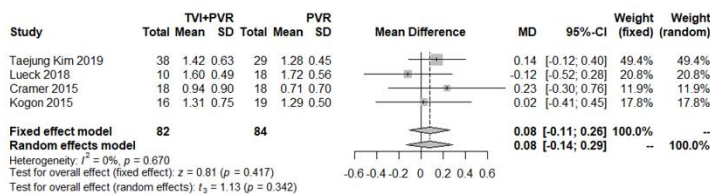

**C. Change from pre-op to post-op TR grade (0-3) in TVI+PVR**

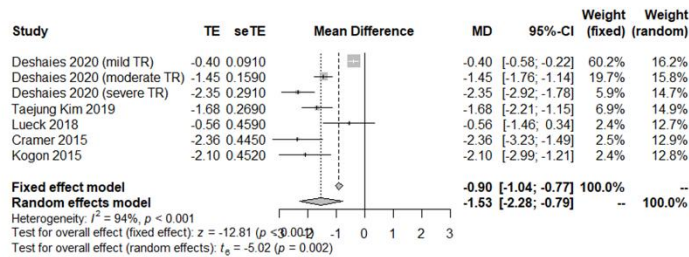

**D. Change from pre-op to post-op TR grade (0-3) in PVR**

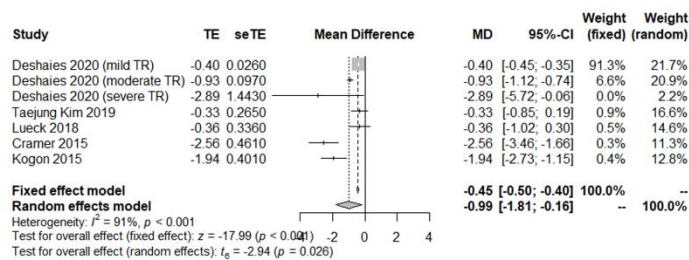

**E. Difference in change in TR grade (0-3) between TVI+PVR and PVR**

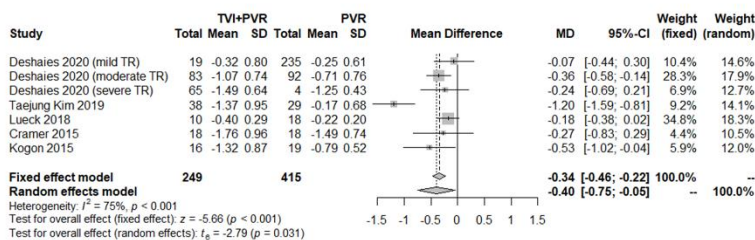

**Figure S3. Forest plots for PR grade (0-3). Pooled mean difference and conclusions plot for all comparisons.** CI, confidence interval; MD, mean difference; PR, pulmonary regurgitation; PVR, pulmonary valve replacement; SD, standard deviation; TVI, tricuspid valve intervention.

**A. Difference in pre-op PR grade (0-3) between TVI+PVR and PVR**

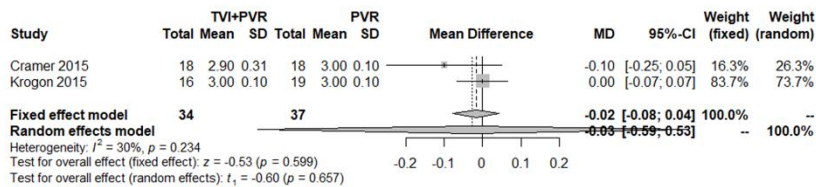

**B. Difference in post-op PR grade (0-3) between TVI+PVR and PVR**

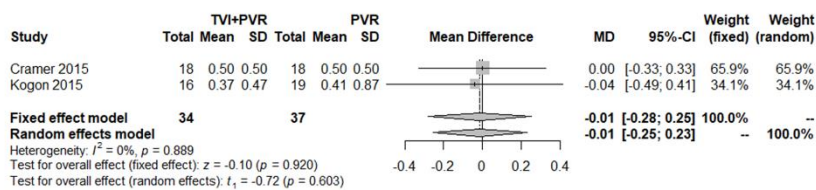

**C. Change from pre-op to post-op PR grade (0-3) in TVI+PVR**

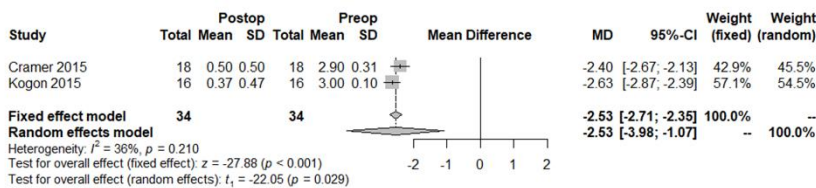

**D. Change from pre-op to post-op PR grade (0-3) in PVR**

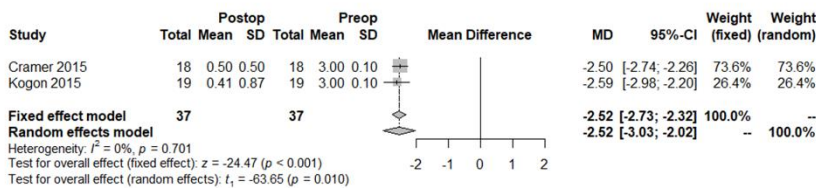

**E. Difference in change in PR grade (0-3) between TVI+PVR and PVR**

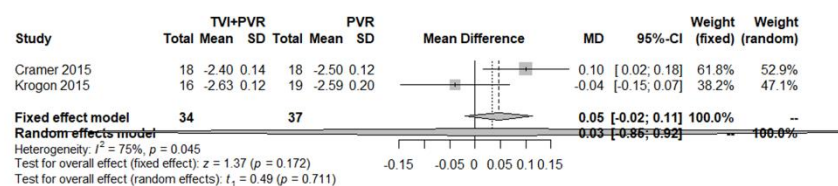

**Figure S4. Forest plots for TV annulus (mm). Pooled mean difference and conclusions plot for all comparisons.** CI, confidence interval; MD, mean difference; PVR, pulmonary valve replacement; SD, standard deviation; TV, tricuspid valve; TVI, tricuspid valve intervention.

**A. Difference in pre-op TV annulus (mm) between TVI+PVR and PVR**

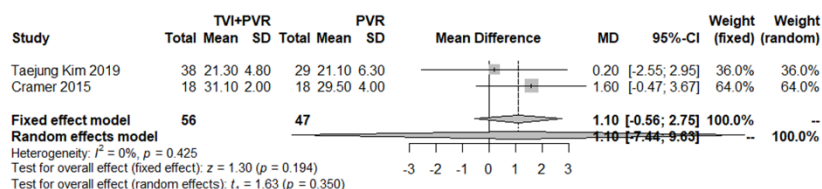

**B. Difference in post-op TV annulus (mm) between TVI+PVR and PVR**

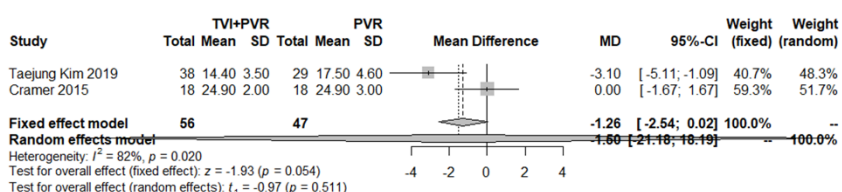

**C. Change from pre-op to post-op TV annulus (mm) in TVI+PVR**

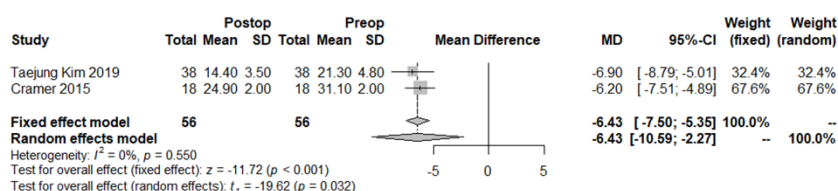

**D. Change from pre-op to post-op TV annulus (mm) in PVR**

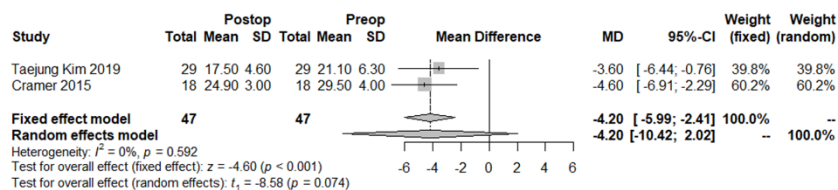

**E. Difference in change in TV annulus (mm) between TVI+PVR and PVR**

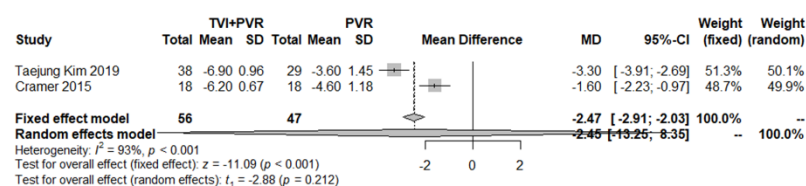



**Figure S5. Forest plots for RV dilatation (0-3). Pooled mean difference and conclusions plot for all comparisons.** CI, confidence interval; MD, mean difference; PVR, pulmonary valve replacement; RV, right ventricular; SD, standard deviation; TVI, tricuspid valve intervention.

**A. Difference in pre-op RV dilatation (0-3) between TVI+PVR and PVR**

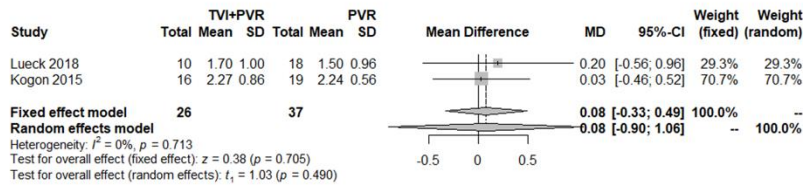

**B. Difference in post-op RV dilatation (0-3) between TVI+PVR and PVR**

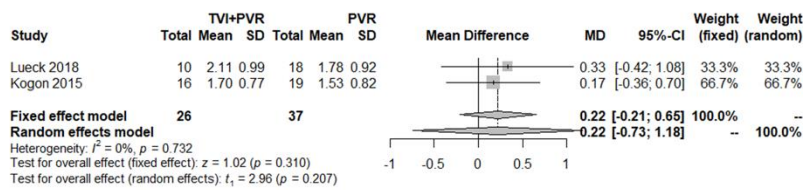

**C. Change from pre-op to post-op RV dilatation (0-3) in TVI+PVR**

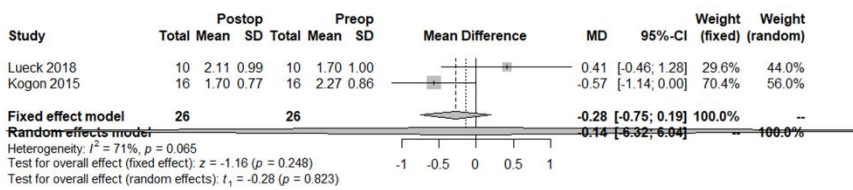

**D. Change from pre-op to post-op RV dilatation (0-3) in PVR**

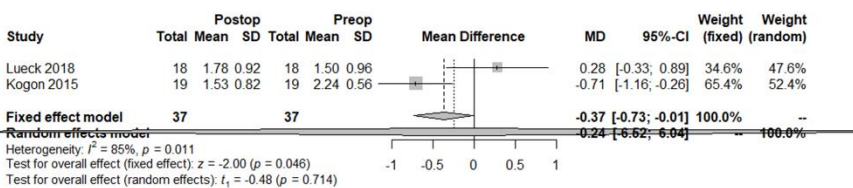

**E. Difference in change in RV dilatation (0-3) between TVI+PVR and PVR**

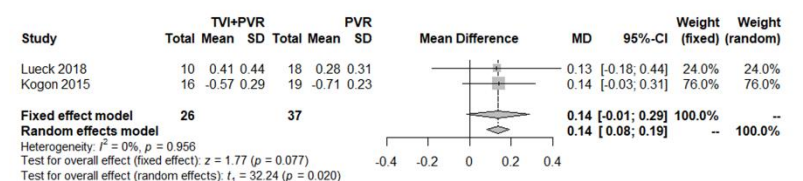

**Figure S6. Forest plots for RV dysfunction (0-3). Pooled mean difference and conclusions plot for all comparisons.** CI, confidence interval; MD, mean difference; PVR, pulmonary valve replacement; RV, right ventricular; SD, standard deviation; TVI, tricuspid valve intervention.

**A. Difference in pre-op RV dysfunction (0-3) between TVI+PVR and PVR**

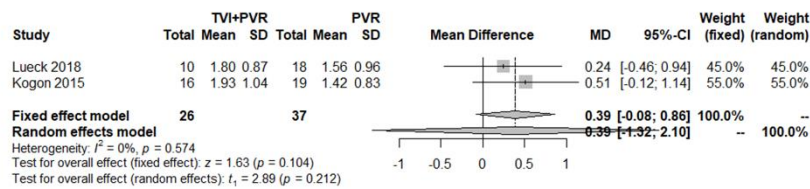

**B. Difference in post-op RV dysfunction (0-3) between TVI+PVR and PVR**

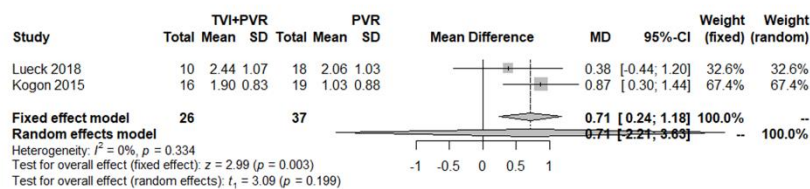

**C. Change from pre-op to post-op RV dysfunction (0-3) in TVI+PVR**

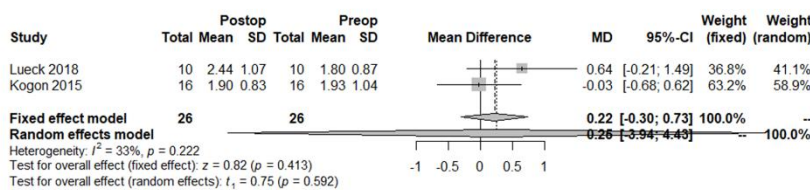

**D. Change from pre-op to post-op RV dysfunction (0-3) in PVR**

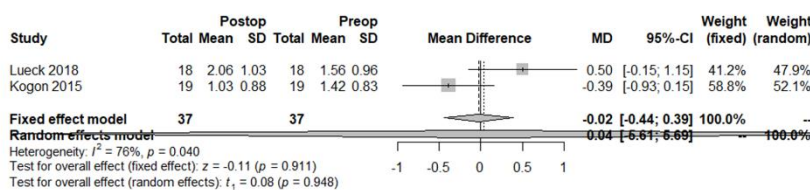

**E. Difference in change in RV dysfunction (0-3) between TVI+PVR and PVR**

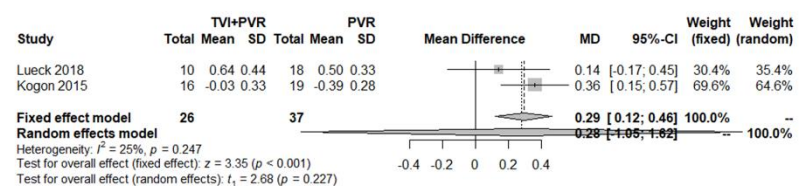



**Figure S7. Forest plots for RVEDV (mL). Pooled mean difference and conclusions plot for all comparisons.** CI, confidence interval; MD, mean difference; PVR, pulmonary valve replacement; RVEDV, right ventricular end-diastolic volume; SD, standard deviation; TVI, tricuspid valve intervention.

**A. Difference in pre-op RVEDV (mL) between TVI+PVR and PVR**

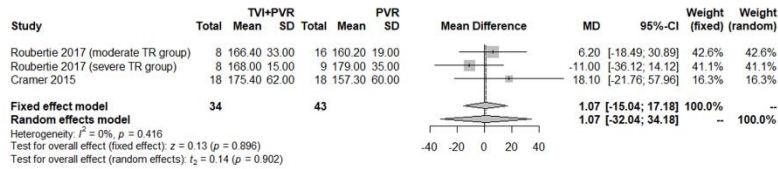

**B. Difference in post-op RVEDV (mL) between TVI+PVR and PVR**

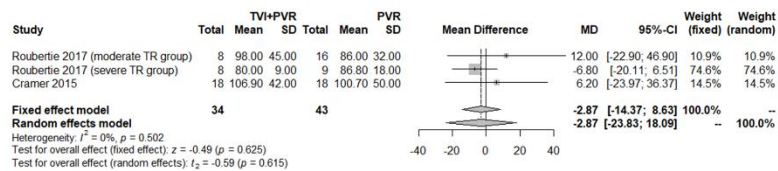

**C. Change from pre-op to post-op RVEDV (mL) in TVI+PVR**

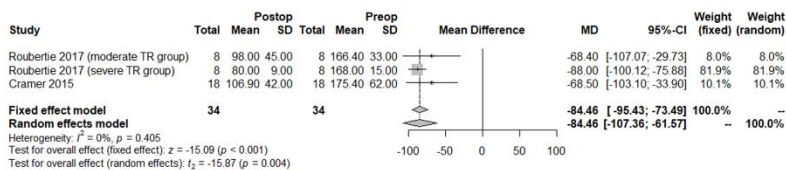

**D. Change from pre-op to post-op RVEDV (mL) in PVR**

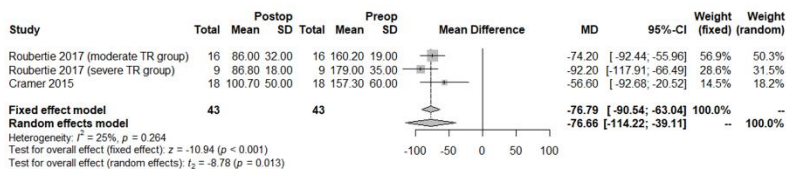

**E. Difference in change in RVEDV (mL) between TVI+PVR and PVR**

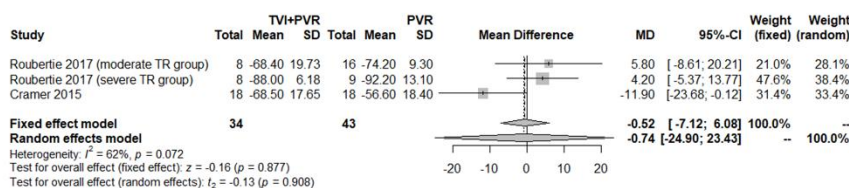

**Figure S8. Forest plots for RVESV (mL). Pooled mean difference and conclusions plot for all comparisons.** CI, confidence interval; MD, mean difference; PVR, pulmonary valve replacement; RVESV, right ventricular end-systolic volume; SD, standard deviation; TVI, tricuspid valve intervention.

**A. Difference in pre-op RVESV (mL) between TVI+PVR and PVR**

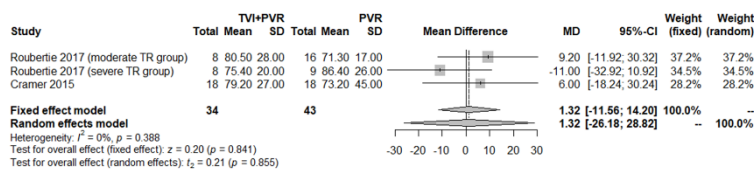

**B. Difference in post-op RVESV (mL) between TVI+PVR and PVR**

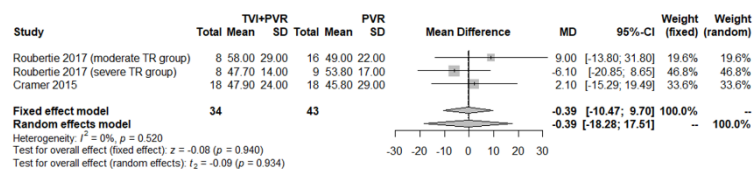

**C. Change from pre-op to post-op RVESV (mL) in TVI+PVR**

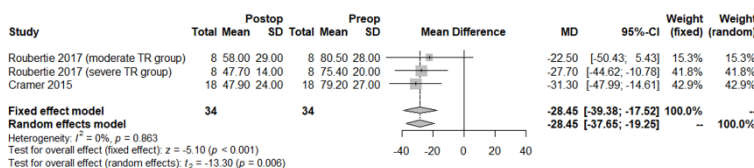

**D. Change from pre-op to post-op RVESV (mL) in PVR**

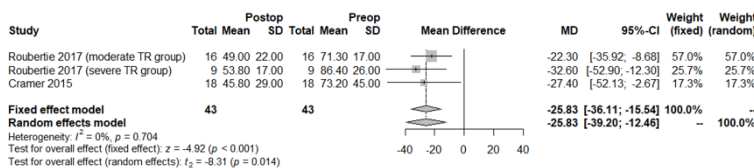

**E. Difference in change in RVESV (mL) between TVI+PVR and PVR**

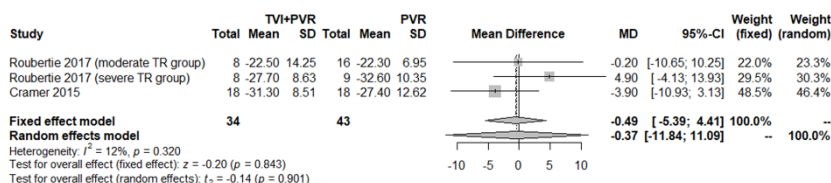

**Figure S9. Forest plots for RVEF (%). Pooled mean difference and conclusions plot for all comparisons.** CI, confidence interval; MD, mean difference; PVR, pulmonary valve replacement; RVEF, right ventricular ejection fraction; SD, standard deviation; TVI, tricuspid valve intervention.

**A. Difference in pre-op RVEF (%) between TVI+PVR and PVR**

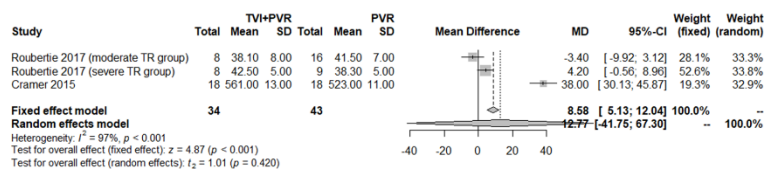

**B. Difference in post-op RVEF (%) between TVI+PVR and PVR**

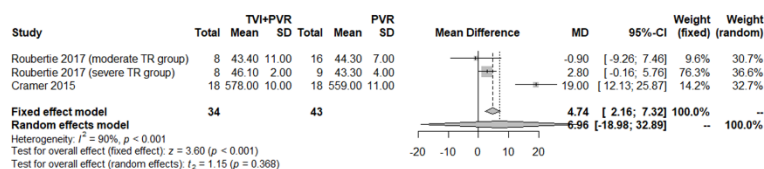

**C. Change from pre-op to post-op RVEF (%) in TVI+PVR**

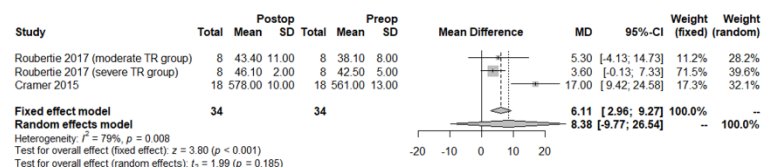

**D. Change from pre-op to post-op RVEF (%) in PVR**

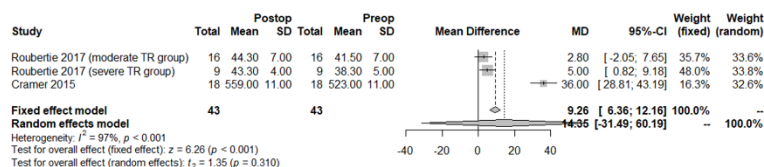

**E. Difference in change in RVEF (%) between TVI+PVR and PVR**

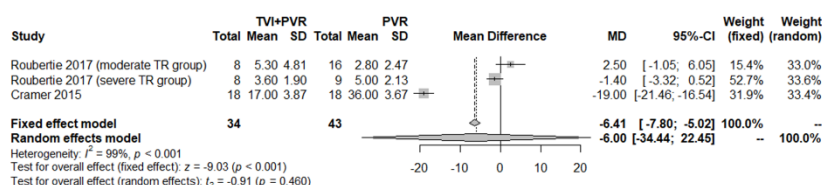

**Figure S10. Forest plot for 30-day mortality. Pooled odds ratio and conclusions plot.** CI, confidence interval; OR, odds ratio; PVR, pulmonary valve replacement; TVI, tricuspid valve intervention.

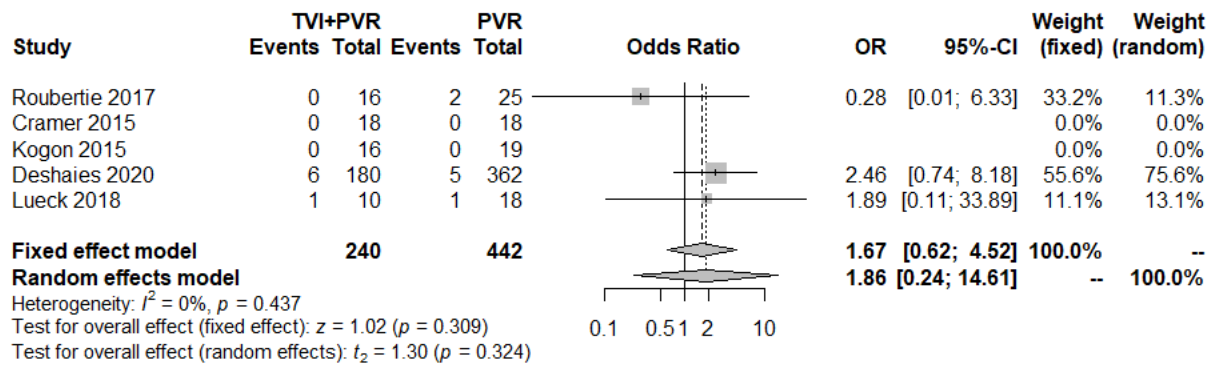

Supplement: JAH3-10-e022909-s001.pdf [file JAH3-10-e022909-s001.pdf]
